# Supplementary material
Source: PubMed Central journal article supplement (PMC4017009)
Supplement: NIHMS539982-supplement-Supp_Figure_S1.pdf [file NIHMS539982-supplement-Supp_Figure_S1.pdf]

Figure S1

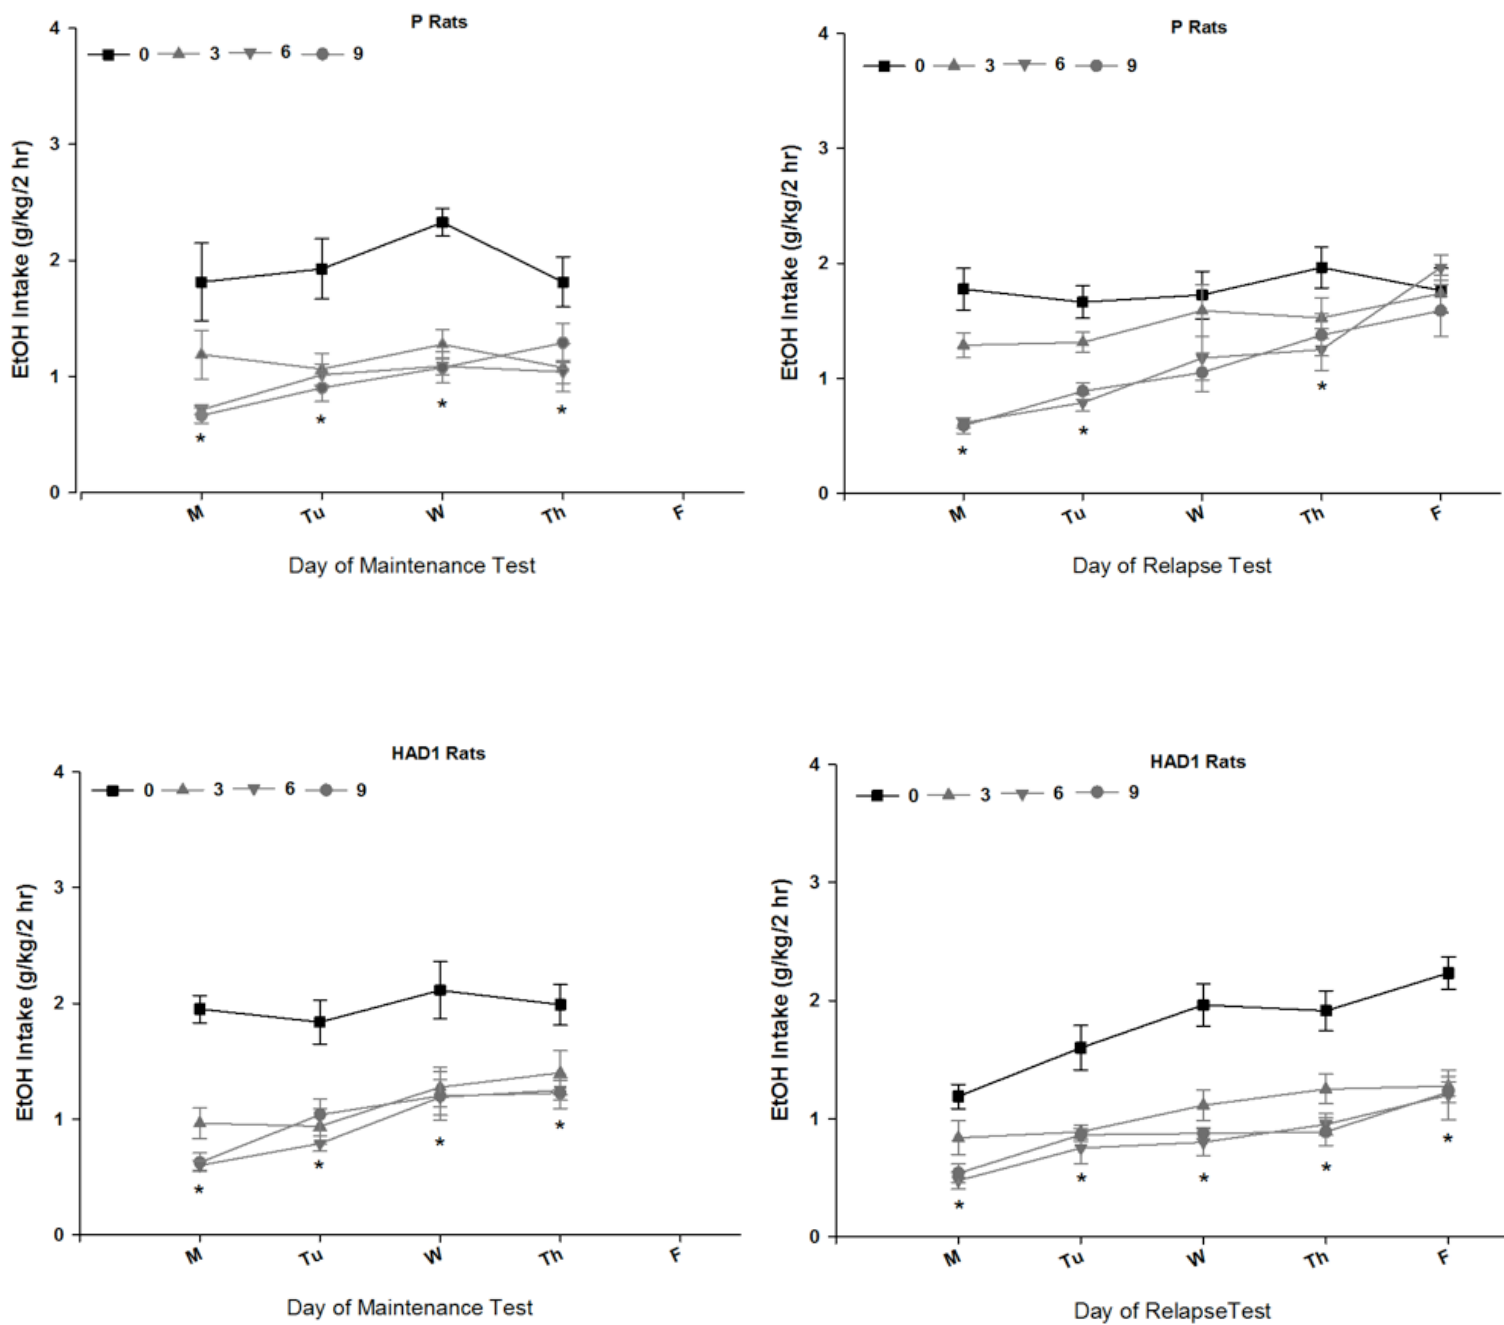

Figure S1. Mean daily 2h ethanol intake for P (upper panels) and HAD1 (lower panels) rats during the maintenance (left side of panel) and relapse (right side of panel) test-phases following administration of vehicle or 3, 6, 9 mg/kg ibudilast. \* indicates the respective dose differed significantly from vehicle ( $p < 0.05$ ).
