# Supplementary material
Source: PubMed Central journal article supplement (PMC4017009)
Supplement: NIHMS539982-supplement-Supp_Figure_S2.pdf [file NIHMS539982-supplement-Supp_Figure_S2.pdf]

Figure S2

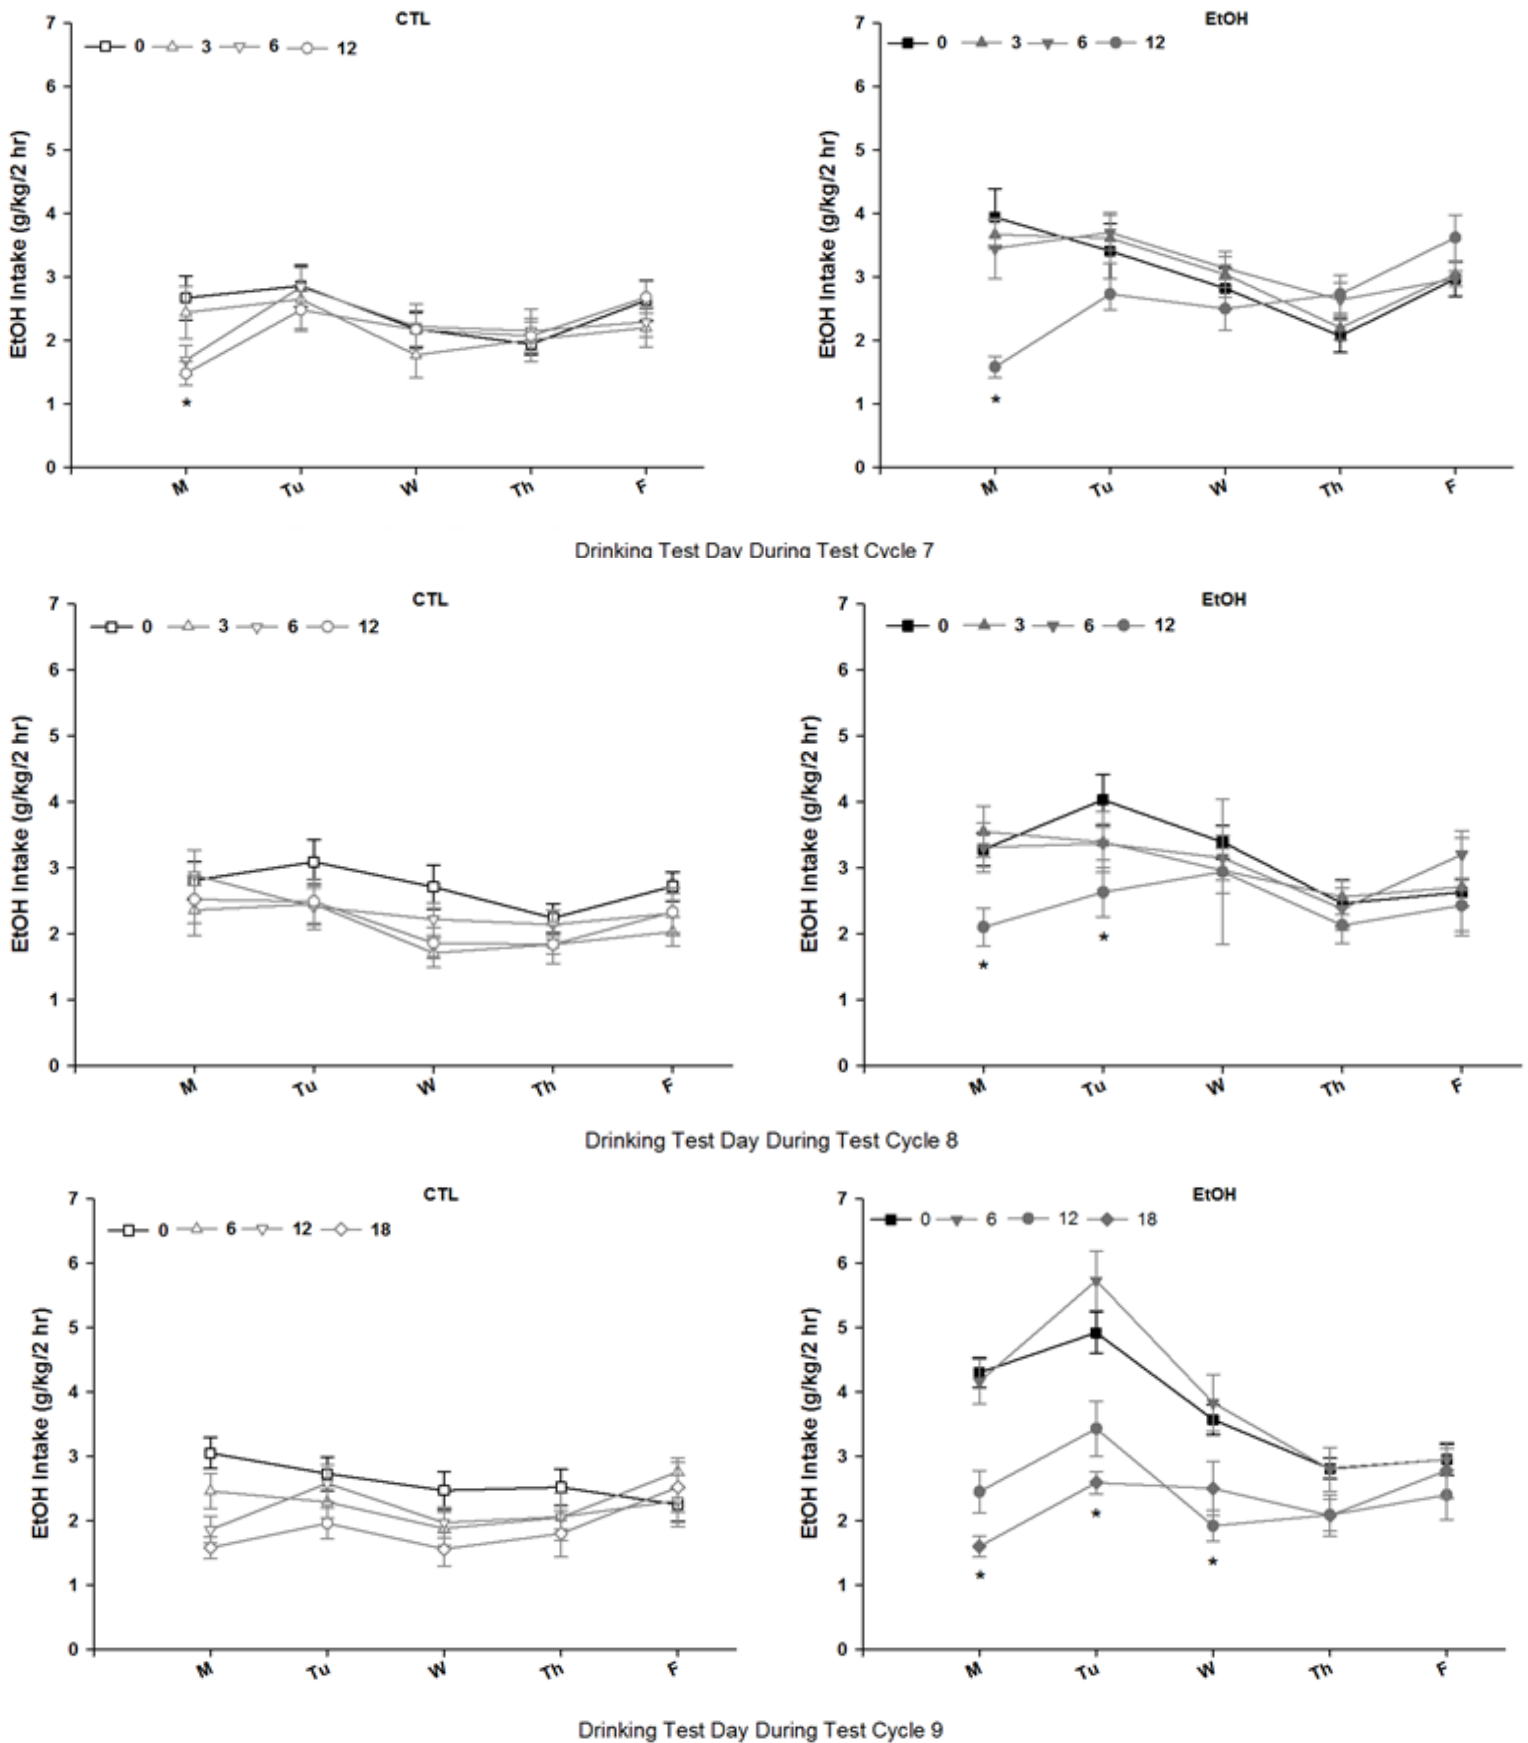

Figure S2. Mean daily 2h ethanol intake for control (left panels) and ethanol dependent (right panels) rats during the Test Cycle 7 (top), Test Cycle 8 (middle), and Test Cycle 9 (bottom) following administration of vehicle or 3, 6, 12, and 18 mg/kg ibudilast. \* indicates the respective dose differed significantly from vehicle ( $p < 0.05$ ).
